## CORRECTION

# Correction: Pinging the brain with visual impulses reveals electrically active, not activity-silent, working memories

Joao Barbosa, Diego Lozano-Soldevilla, Albert Compte

In Fig 3, the inset is uninterpretable and should be removed. The derivation of the shuffle predictor for this data is compromised due to baselining in the interval [-200 ms, 0], a period containing traces of the memory code of the unattended stimulus. This baselining introduces a spurious code aligned with the decoding of interest, so that random permutation of stimulus labels cannot properly estimate the relevant shuffle predictor.

The authors have provided a corrected version of Fig 3 here and amended the caption accordingly.

In the Results subsection 'Lack of statistical power suggests spurious evidence for silent representations of unattended memories,' sentence 9 should be removed. The correct sentence series is:

We found that unattended memories could be robustly decoded during the whole delay (0.25–1.2 s,  $p = 0.002$  randomization test, Methods) and in particular immediately before ping-pong (250 ms window,  $p = 0.039$ , randomization test, Methods) from high-decoding sessions, while discarded memories could not (both  $p > 0.45$ , Fig 3). Note that we used one-sided statistical tests (Figs 2 and 3), since negative decoding strengths are not expected.

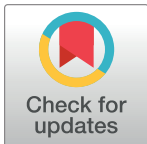

## OPEN ACCESS

**Citation:** Barbosa J, Lozano-Soldevilla D, Compte A (2022) Correction: Pinging the brain with visual impulses reveals electrically active, not activity-silent, working memories. *PLoS Biol* 20(3): e3001603. <https://doi.org/10.1371/journal.pbio.3001603>

**Published:** March 25, 2022

**Copyright:** © 2022 Barbosa et al. This is an open access article distributed under the terms of the [Creative Commons Attribution License](https://creativecommons.org/licenses/by/4.0/), which permits unrestricted use, distribution, and reproduction in any medium, provided the original author and source are credited.

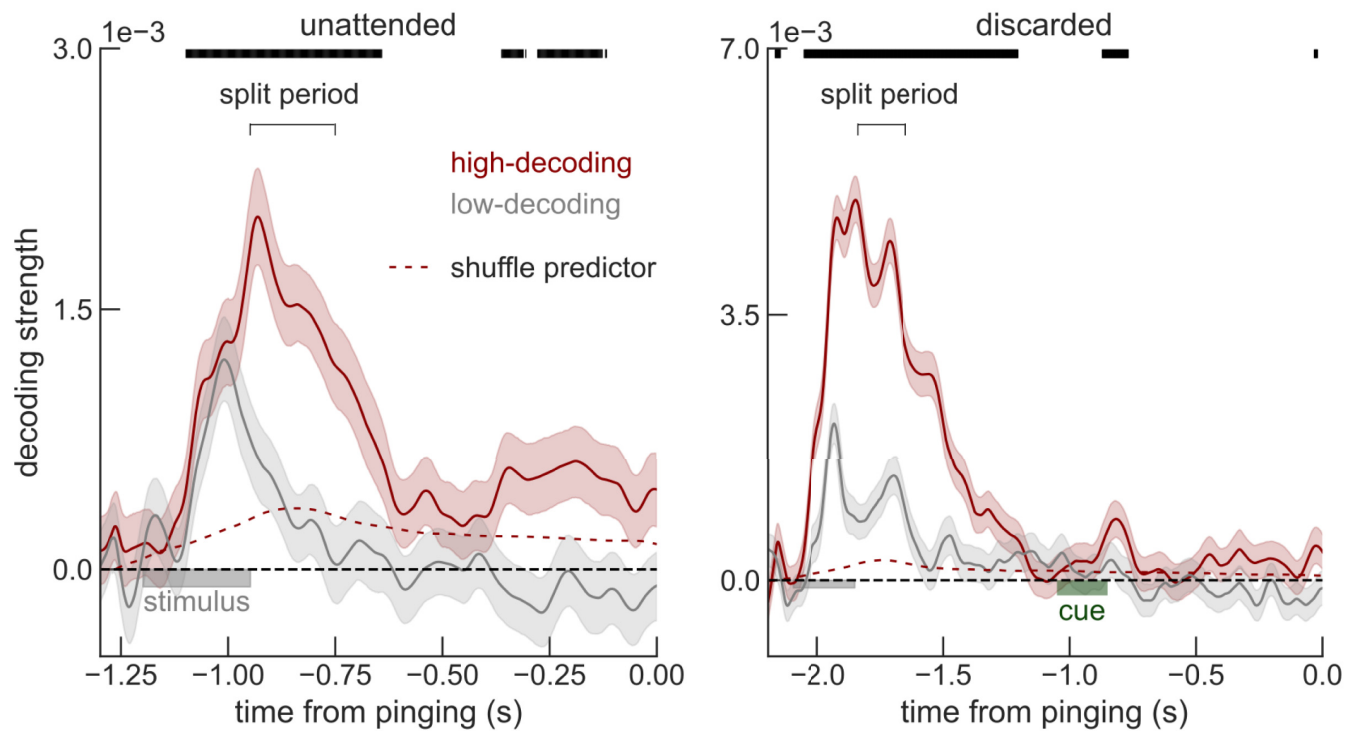

**Fig 3.** Sessions with high early-delay (split period, Methods) voltage decoding have a sustained code for unattended memories (left, red), but not for discarded memories (right). Error bars are sem. Decoding strengths from high-decoding sessions were compared to the shuffle predictor (top black bars mark significant deviation, one-sided  $p < 0.05$ , Methods). Time course and data are similar to Fig 1A and 1B. Data from Wolff and colleagues (2017) [7].

<https://doi.org/10.1371/journal.pbio.3001603.g001>

## Reference

1. Barbosa J, Lozano-Soldevilla D, Compte A (2021) Pinging the brain with visual impulses reveals electrically active, not activity-silent, working memories. *PLoS Biol* 19(10): e3001436. <https://doi.org/10.1371/journal.pbio.3001436> PMID: 34673775
